# Supplementary material for: Structural basis for activation and gating of IP3 receptors
Source: PubMed Central journal article supplement (PMC8930994; doi:10.1038/s41467-022-29073-2), 2022-03-17
Supplement: 41467_2022_29073_MOESM1_ESM.pdf [file 41467_2022_29073_MOESM1_ESM.pdf]

**Supplementary Information:**

**Structural basis for activation and gating of IP<sub>3</sub> receptors**

Emily A. Schmitz, Hirohide Takahashi, Erkan Karakas

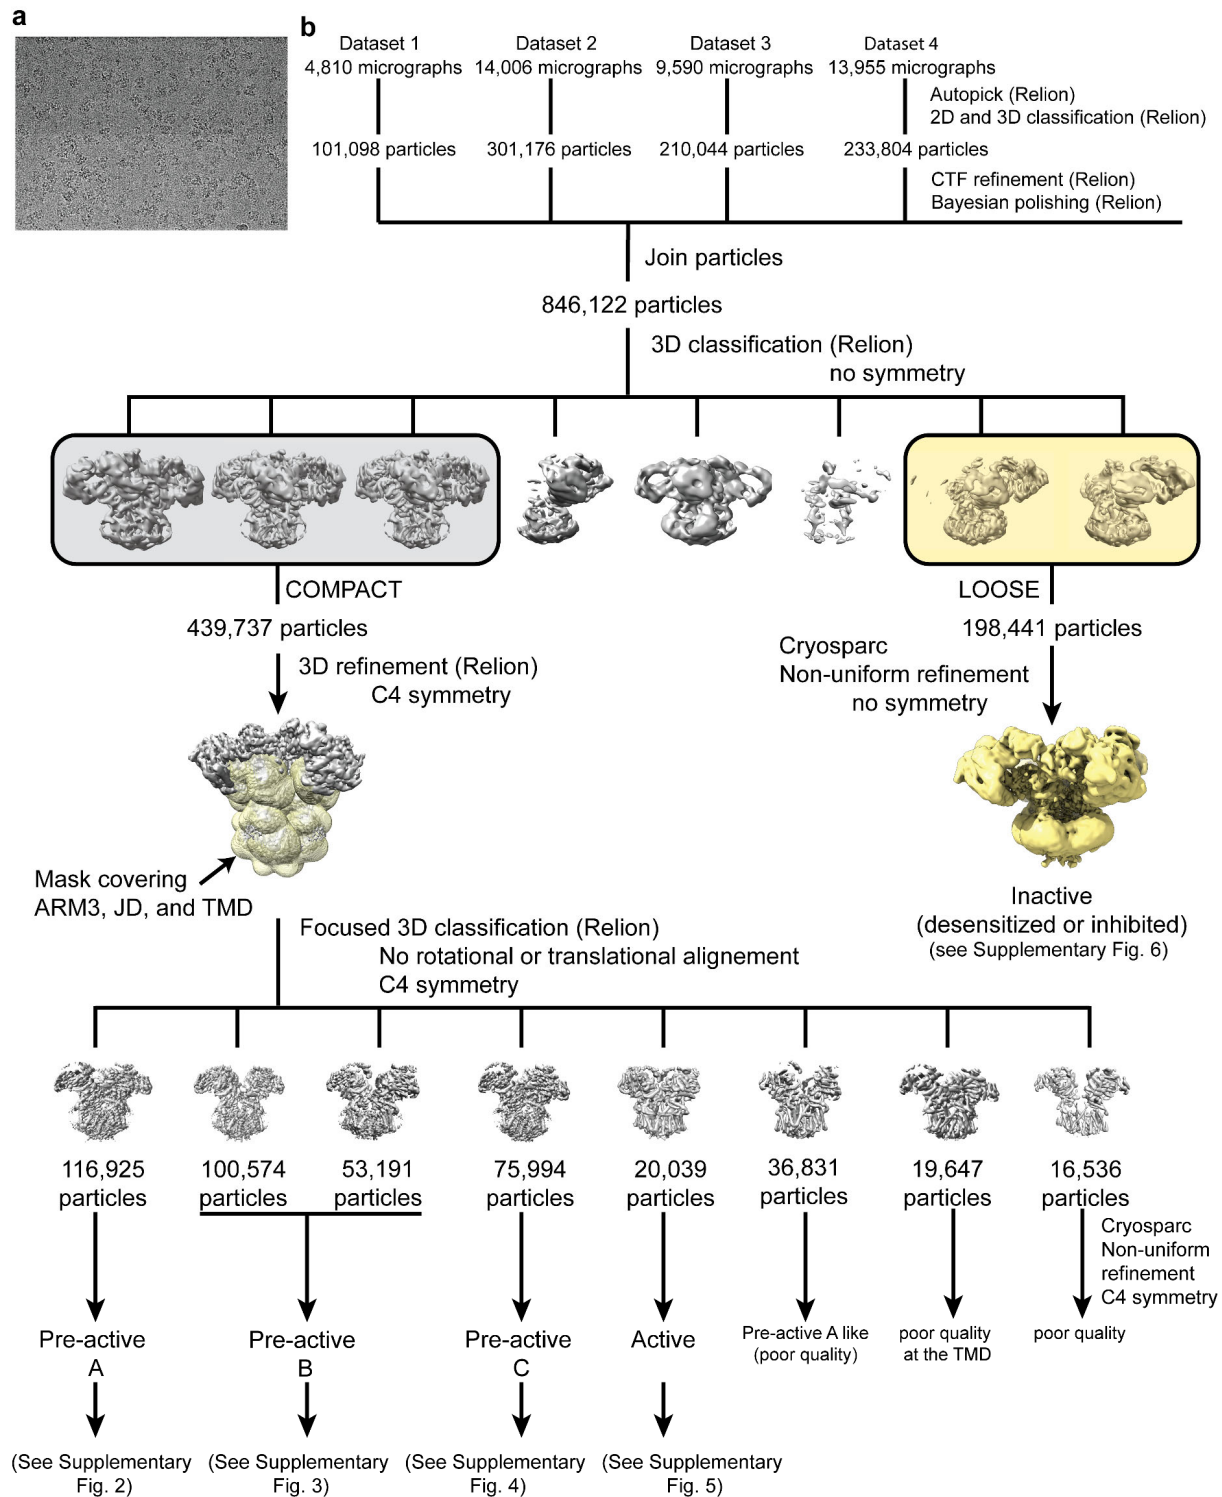

**Supplementary Fig. 1: Cryo-EM analysis of hIP<sub>3</sub>R-3.** **a** Representative cryo-EM micrograph of the hIP<sub>3</sub>R-3 dataset. **b** Flowchart detailing the particle selection and refinement procedure to obtain the cryo-EM maps of hIP<sub>3</sub>R-3 in different gating conformations. The structure in the inactive conformation (yellow) is low-pass filtered using a local resolution map. See methods for details.

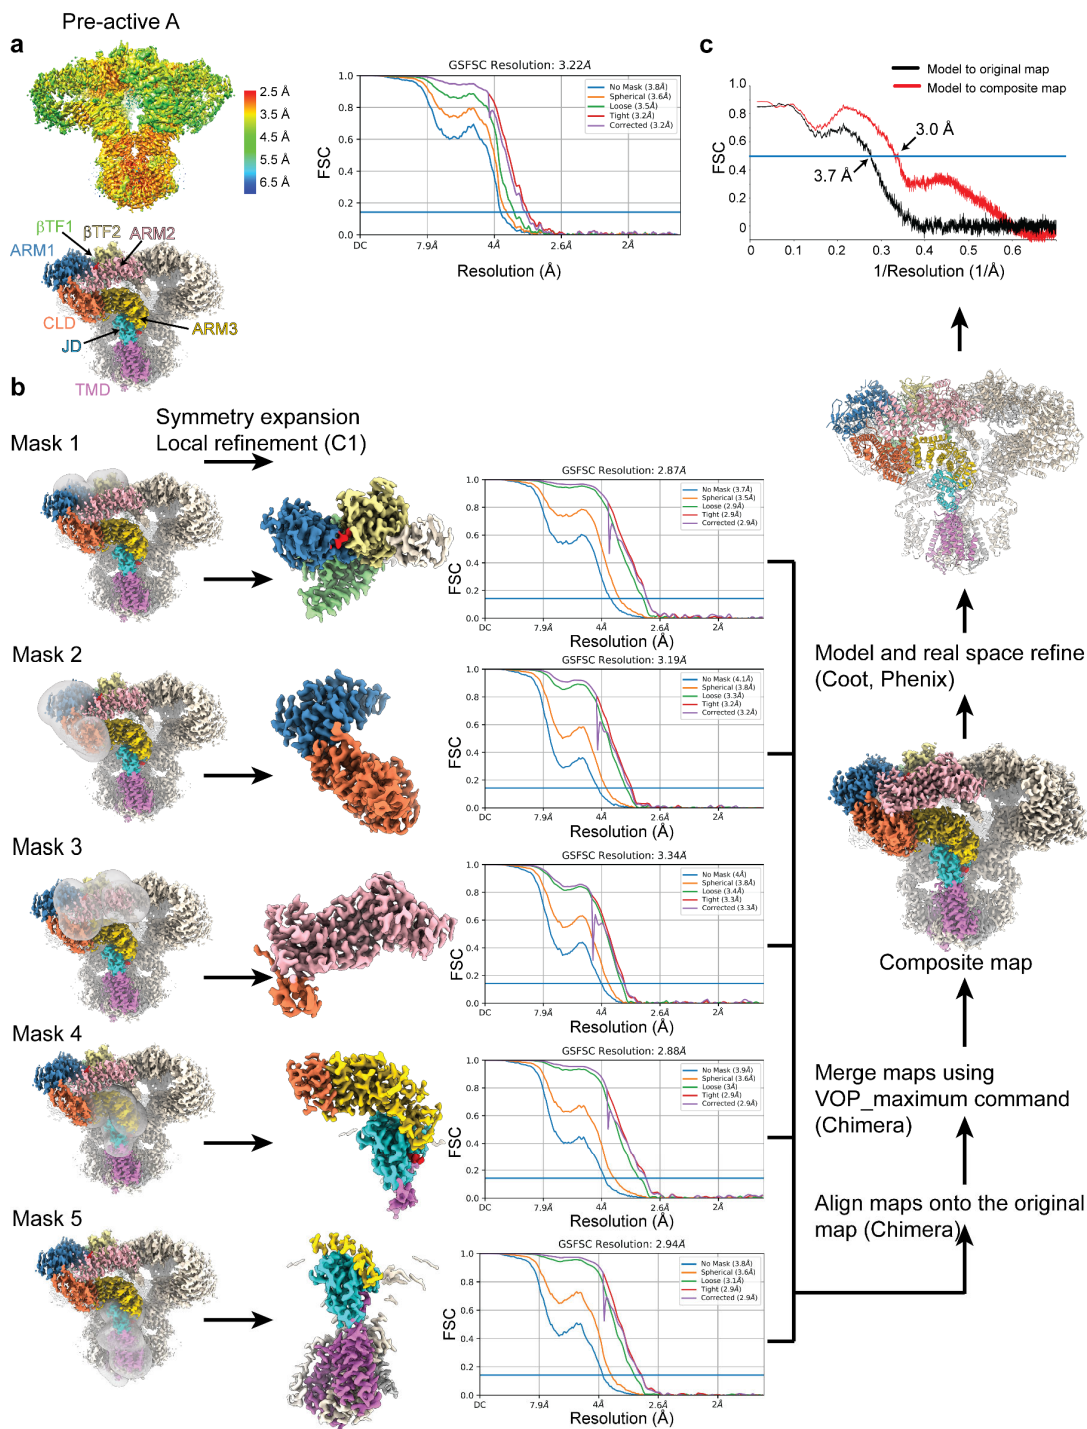

**Supplementary Fig. 2: Cryo-EM analysis of hIP3R-3 in the pre-active A state.** **a** The final refined 3D reconstructions of hIP3R-3 colored by local resolution (top) and individual domains (bottom) as in Fig. 1. FSC curve after Non-uniform refinement in CryoSPARC is shown. **b** Diagram showing the local refinement strategy. Masks are shown transparent, and domains are colored as in Fig.1. Arrows point to the maps obtained after local refinement. FSC curves after local refinement in CryoSPARC are shown for each mask. See methods for details. **c** FSC curves of the refined model versus the original EM map (black) and the composite map (red) are shown.

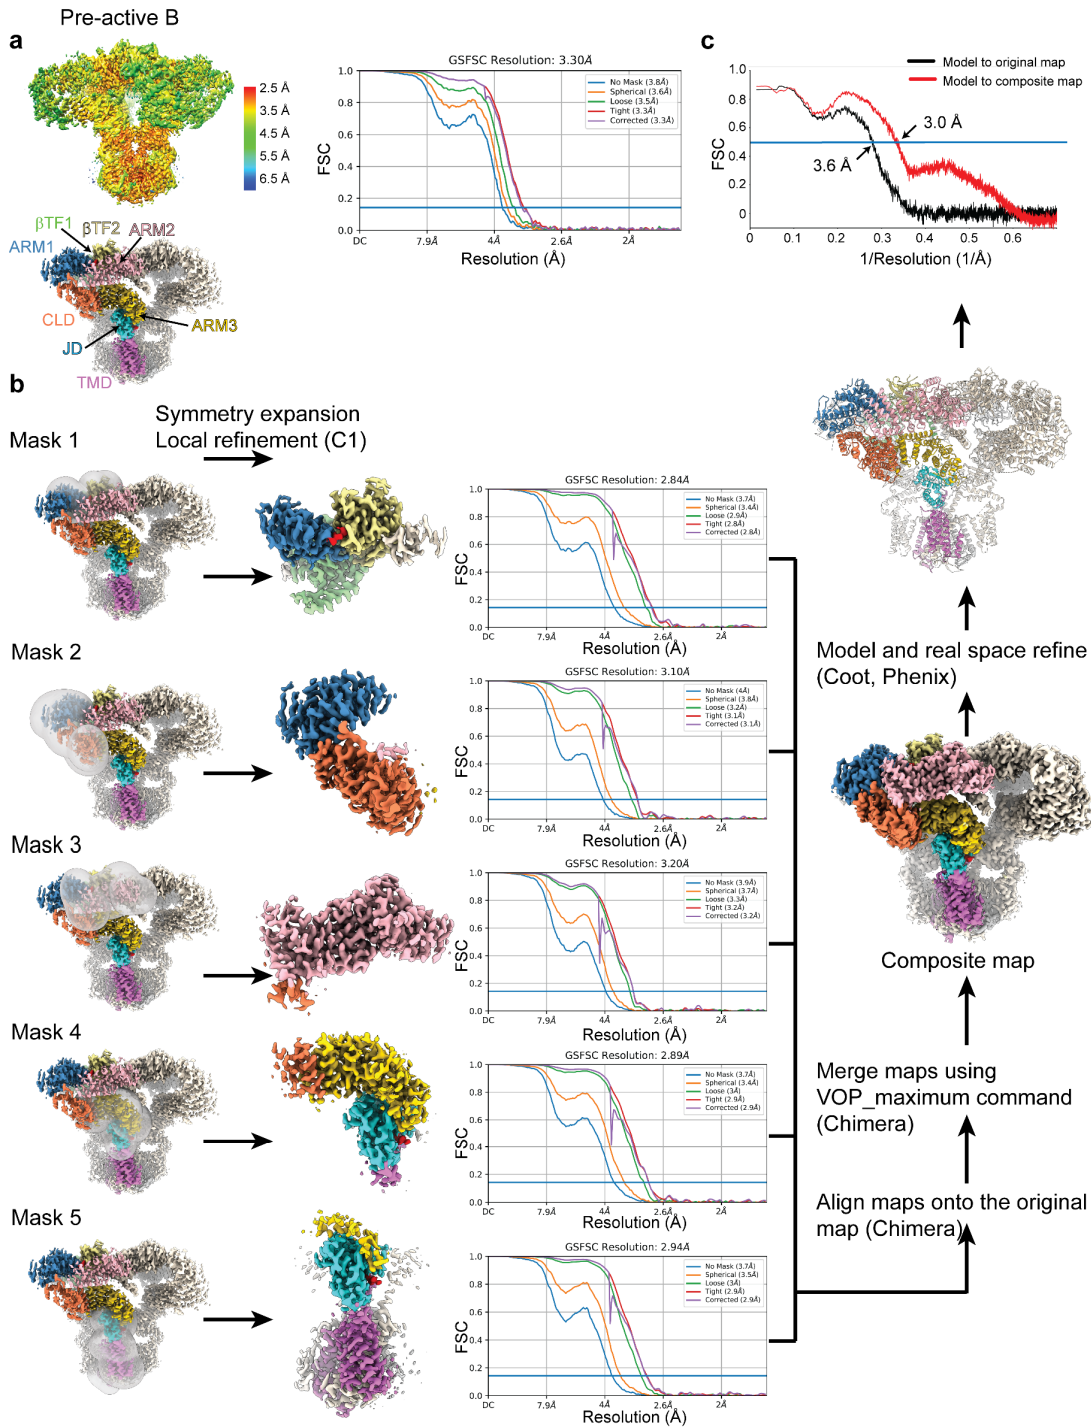

**Supplementary Fig. 3: Cryo-EM analysis of hIP3R-3 in the pre-active B state.** **a** The final refined 3D reconstructions of hIP3R-3 colored by local resolution (top) and individual domains (bottom) as in Fig. 1. FSC curve after Non-uniform refinement in CryoSPARC is shown. **b** Diagram showing the local refinement strategy. Masks are shown transparent, and domains are colored as in Fig.1. Arrows point to the maps obtained after local refinement. FSC curves after local refinement in CryoSPARC are shown for each mask. See methods for details. **c** FSC curves of the refined model versus the original EM map (black) and the composite map (red) are shown.

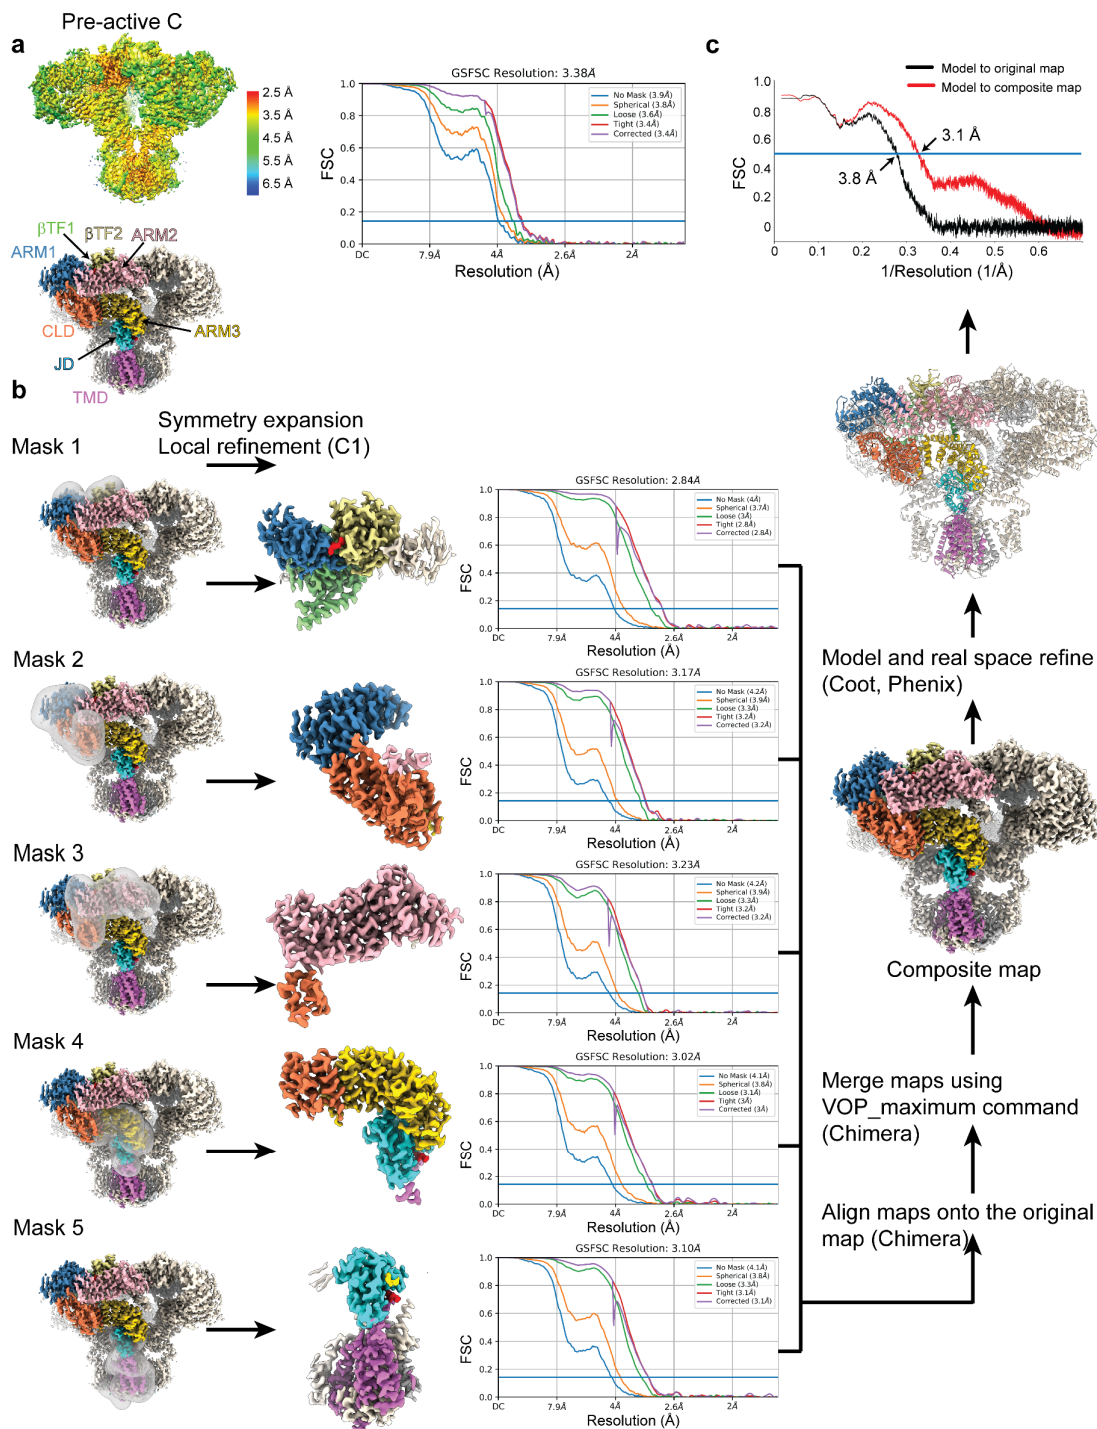

**Supplementary Fig. 4: Cryo-EM analysis of hIP3R-3 in the pre-active C state.** **a** The final refined 3D reconstructions of hIP3R-3 colored by local resolution (top) and individual domains (bottom) as in Fig. 1. FSC curve after Non-uniform refinement in CryoSPARC is shown. **b** Diagram showing the local refinement strategy. Masks are shown transparent, and domains are colored as in Fig.1. Arrows point to the maps obtained after local refinement. FSC curves after local refinement in CryoSPARC are shown for each mask. See methods for details. **c** FSC curves of the refined model versus the original EM map (black) and the composite map (red) are shown.

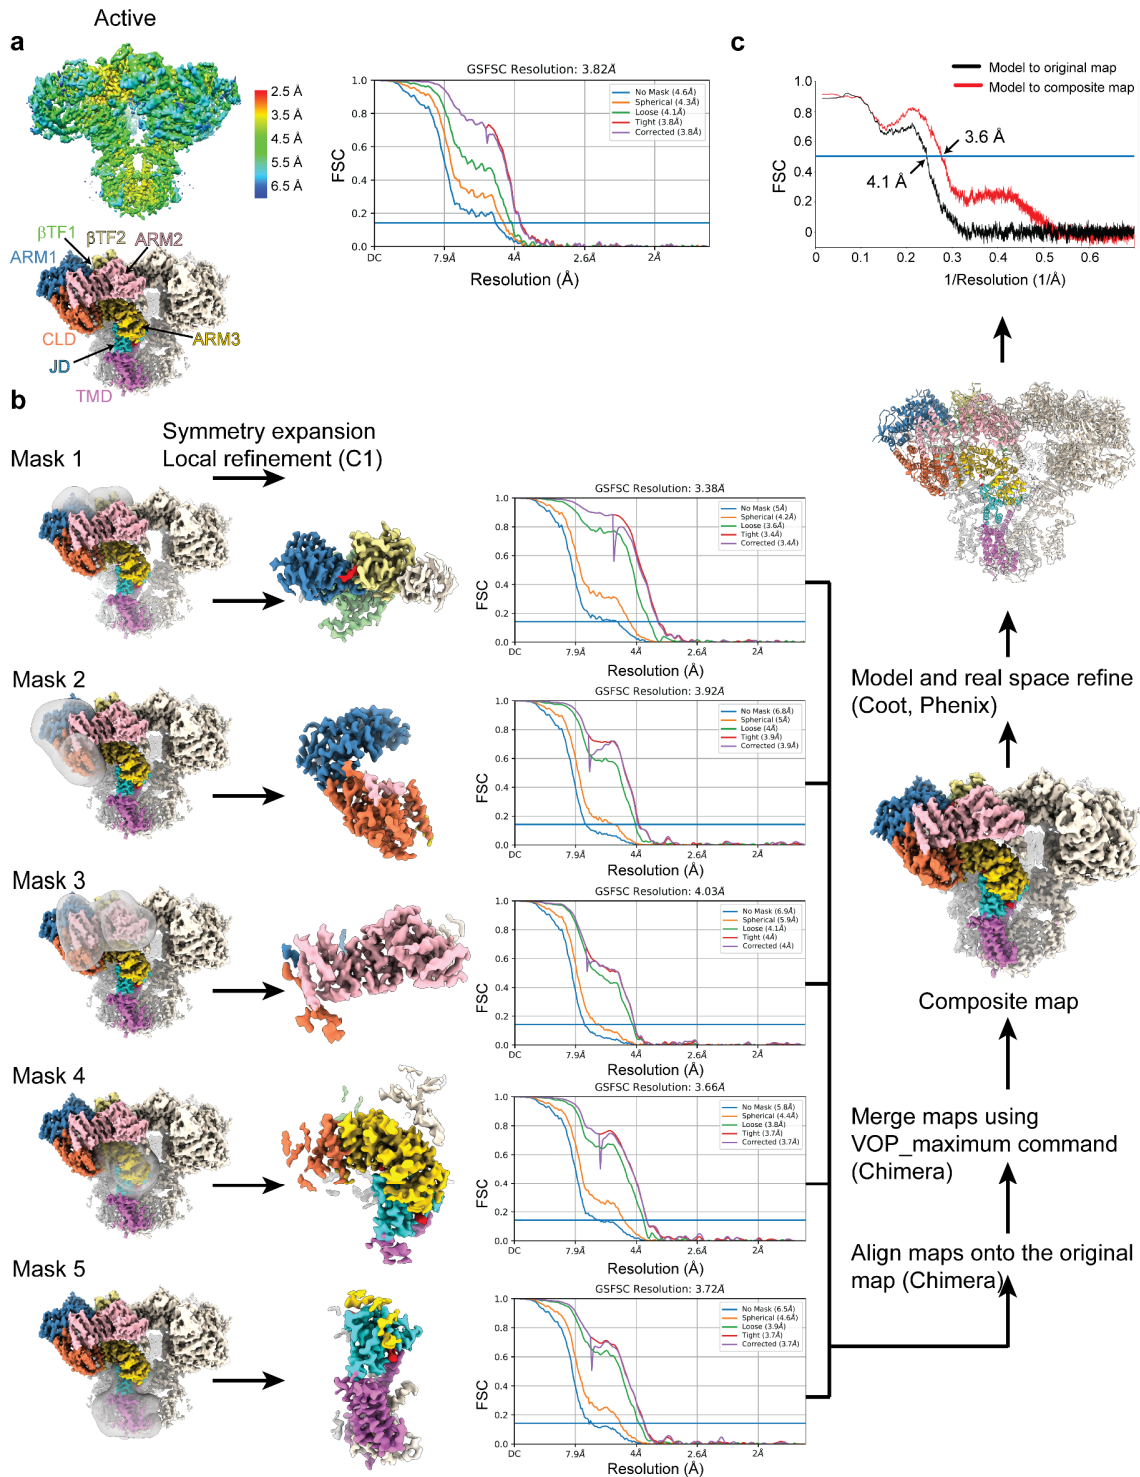

**Supplementary Fig. 5: Cryo-EM analysis of hIP3R-3 in the active state.** **a** The final refined 3D reconstructions of hIP3R-3 colored by local resolution (top) and individual domains (bottom) as in Fig. 1. FSC curve after Non-uniform refinement in CryoSPARC is shown. **b** Diagram showing the local refinement strategy. Masks are shown transparent, and domains are colored as in Fig.1. Arrows point to the maps obtained after local refinement. FSC curves after local refinement in CryoSPARC are shown for each mask. See methods for details. **c** FSC curves of the refined model versus the original EM map (black) and the composite map (red) are shown.

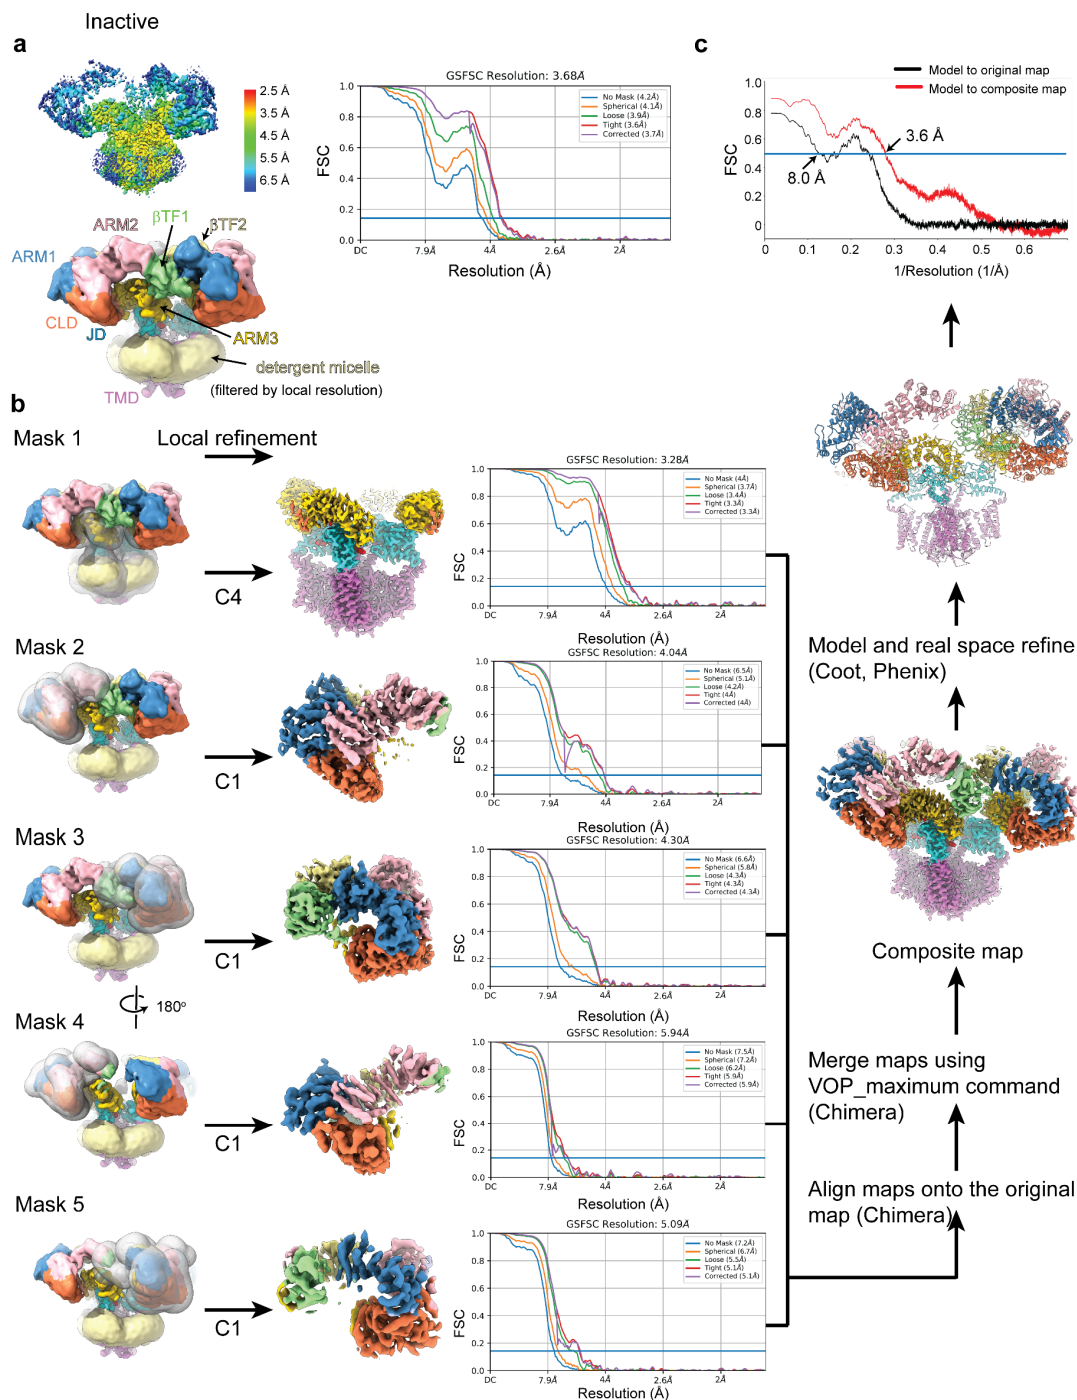

**Supplementary Fig. 6: Cryo-EM analysis of hIP3R-3 in the inactive state.** **a** The final refined 3D reconstructions of hIP3R-3 colored by local resolution (top) and individual domains (bottom) as in Fig. 1. The map colored by individual domains is low-pass filtered using the local resolution map. FSC curve after Non-uniform refinement in CryoSPARC is shown. **b** Diagram showing the local refinement strategy. Masks are shown transparent, and domains are colored as in Fig.1. Arrows point to the maps obtained after local refinement. FSC curves after local refinement in CryoSPARC are shown for each mask. See methods for details. **c** FSC curves of the refined model versus the original EM map (black) and the composite map (red) are shown.

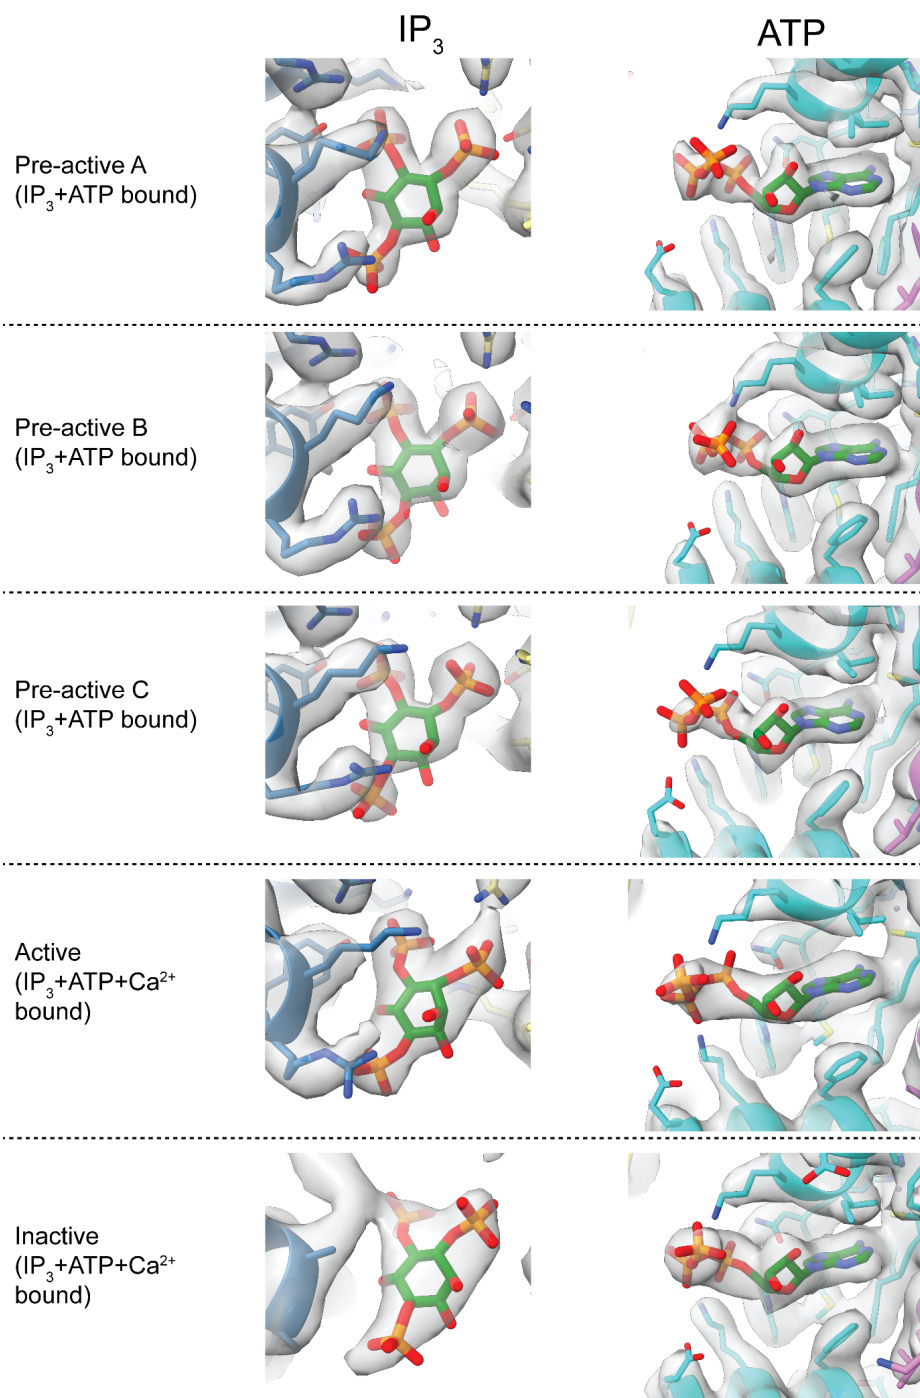

**Supplementary Fig. 7: Ligand binding sites.** Density maps for the  $IP_3$  and ATP binding sites obtained through local refinements are shown as transparent grey surfaces. The ligands and the neighboring residues are represented as sticks.



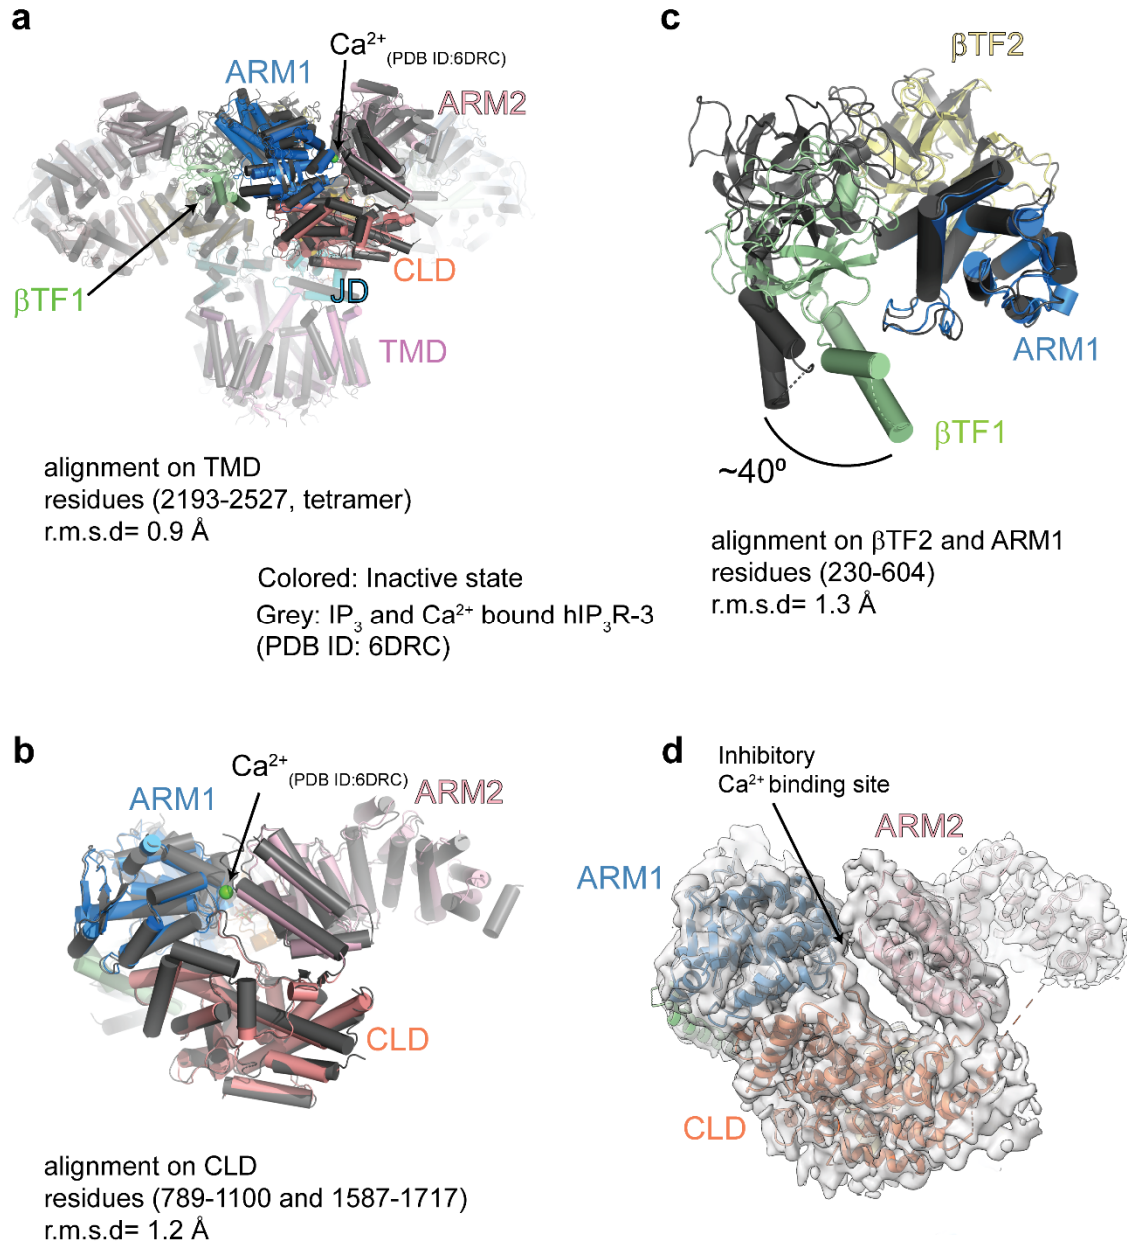

**Supplementary Fig. 8: Structural comparison of the hIP<sub>3</sub>R-3 structures in the inactive and Ca<sup>2+</sup> inhibited states.** **a-c** Ribbon representations of hIP<sub>3</sub>R-3 in the inactive state and the previously published IP<sub>3</sub> and Ca<sup>2+</sup> bound hIP<sub>3</sub>R-3 structure (colored as in Fig. 1) obtained in the presence of inhibitory Ca<sup>2+</sup> concentrations (grey, PDB ID: 6DRC<sup>1</sup>) focusing on similarities in the overall structures (**a**) and the inhibitory Ca<sup>2+</sup> binding site (**b**), and differences in the IP<sub>3</sub> binding core and  $\beta$ TF1 orientation (**c**). The aligned regions and the root mean square deviation (r.m.s.d) values are shown for each panel. The green sphere represents the Ca<sup>2+</sup> modeled in 6DRC. **d** Cryo-EM map after local refinement (transparent gray) is shown around the ribbon representation of the ARM1, CLD, and ARM2 of the inactive structure. Although the quality of the map allows modeling the domains, the density for the side chains of the residues around the Ca<sup>2+</sup> binding site is poorly resolved, hampering inspection of the presence of Ca<sup>2+</sup>.

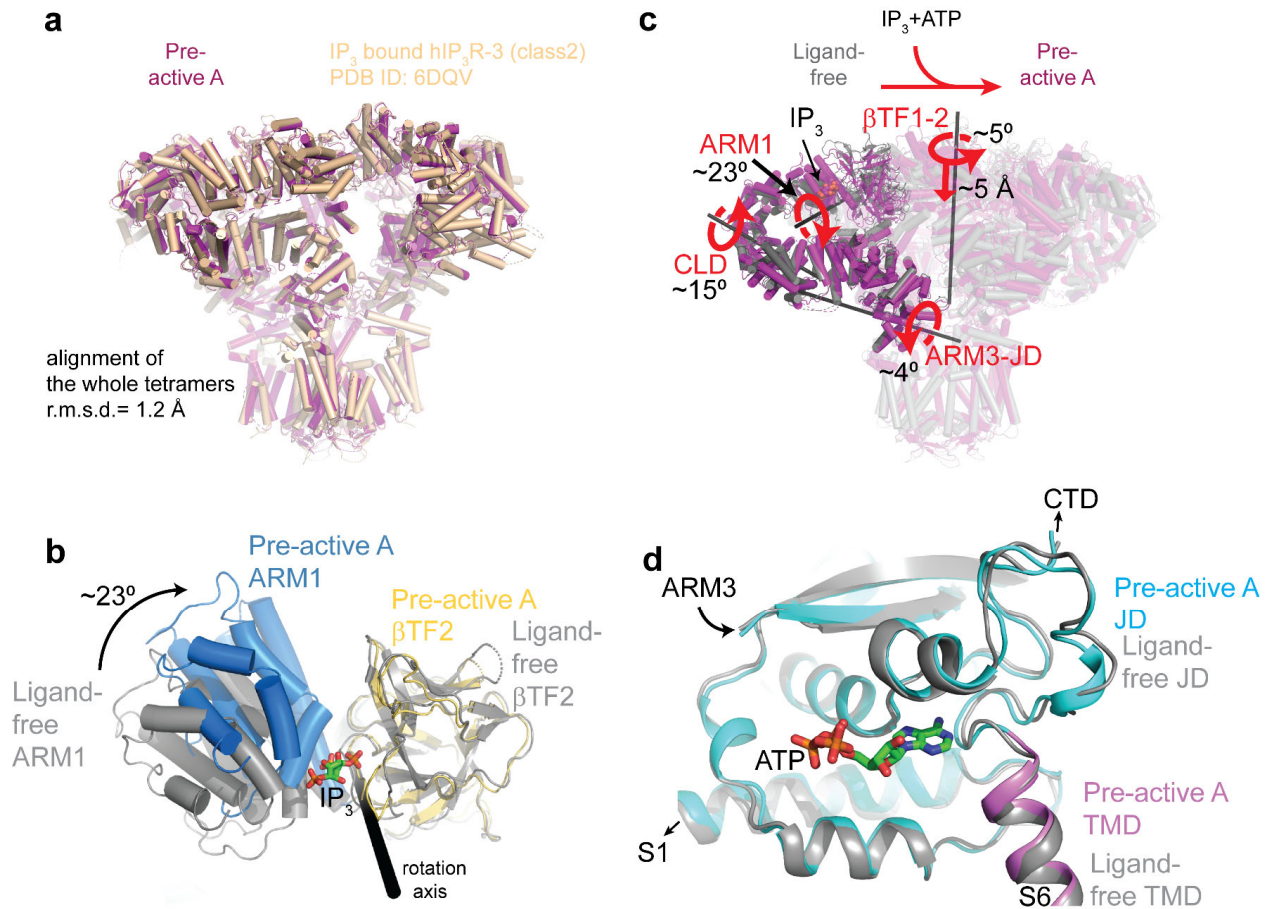

**Supplementary Fig. 9: Structural comparison of the hIP<sub>3</sub>R-3 structures in the ligand-free and Pre-active A conformations.** **a** Ribbon representations of hIP<sub>3</sub>R-3 in the pre-active A state and the previously published IP<sub>3</sub> bound class 2 state (PDB ID: 6DQV<sup>1</sup>). The intact receptors are used for alignment. **b** IP<sub>3</sub> induced conformational changes resulting in 23° rotation of the ARM1 relative to betaTF2. The structures are aligned on the betaTF2. Pre-active A structure is colored as in Fig.1, and Ligand-free structure is colored in grey. IP<sub>3</sub> is shown as green sticks. **c** Ribbon representations of hIP<sub>3</sub>R structures in the resting (PDB ID: 6UQK<sup>2</sup>) superposed on the residues forming the selectivity filter and P-helix of the TMDs, emphasizing the conformational changes upon IP<sub>3</sub> and ATP binding. Domains with substantial conformational changes are shown in full colors only on one subunit, while the rest of the protein is transparent. Curved and straight red arrows indicate the rotation and translation of the domains with red labels relative to the rotation axis (black bars), respectively. **d** Close-up view of the ATP binding site. Pre-active A structure is colored as in Fig.1, and Ligand-free structure is colored in grey. ATP is shown as green sticks. No major conformational changes around the binding site are observed.

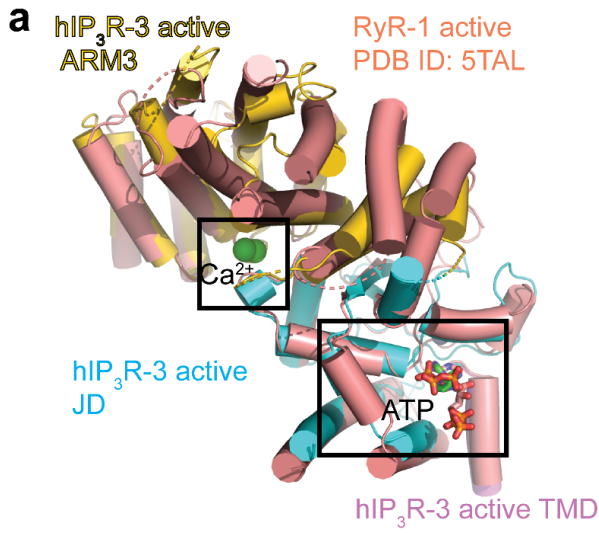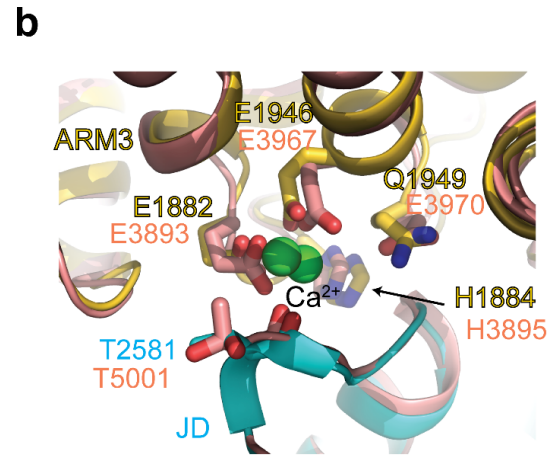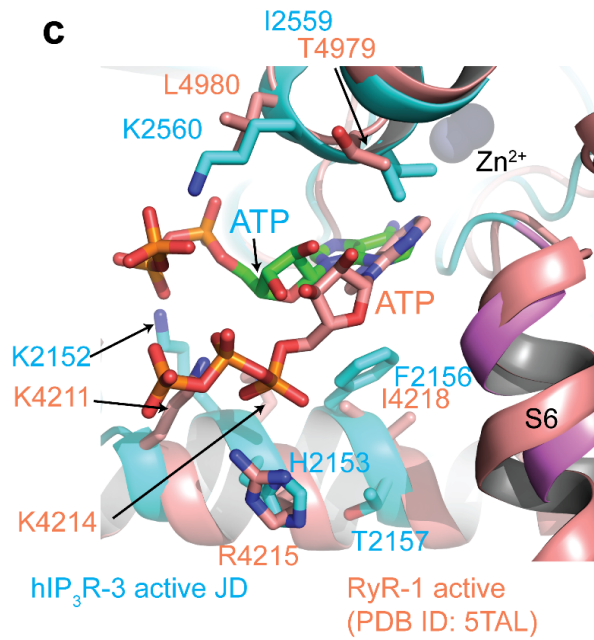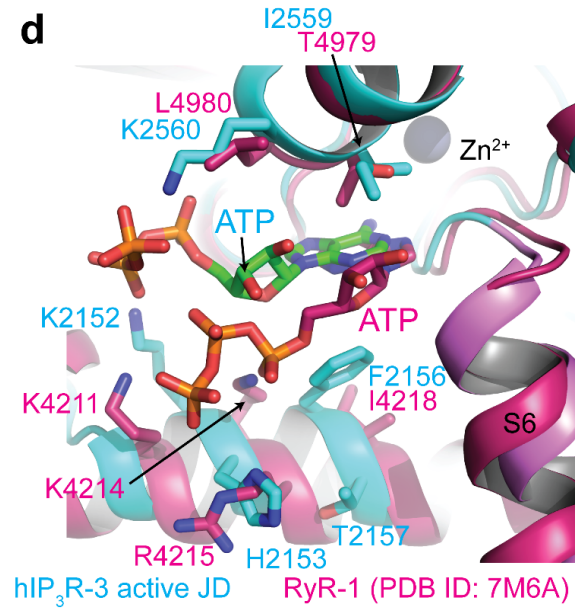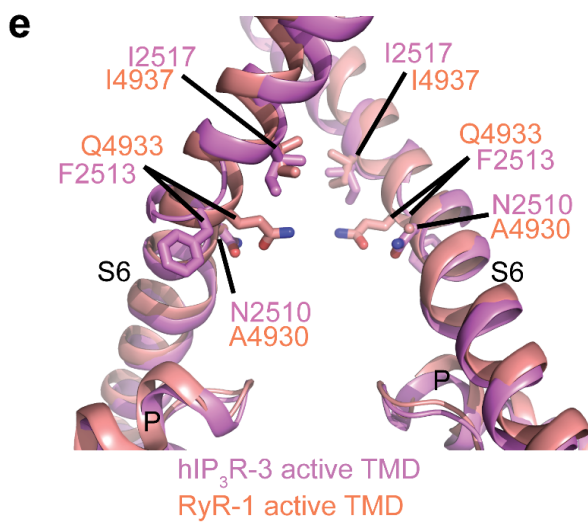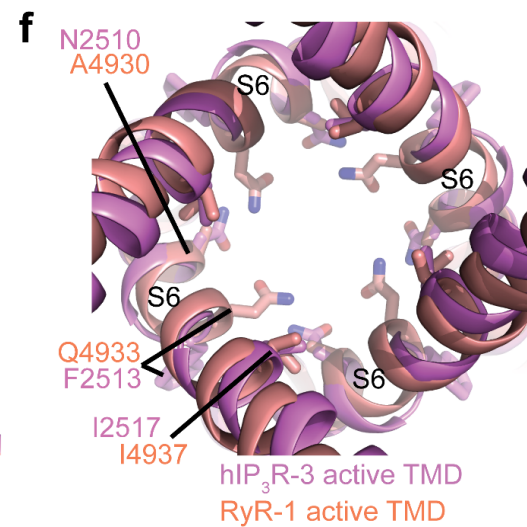

**Supplementary Fig. 10: Structural comparison of hIP<sub>3</sub>R-3 and RyR1 structures in the active state.** **a** An overlay of the ARM3, JD, and part of S6 of hIP<sub>3</sub>R-3 with the corresponding domains of rabbit RyR-1 (PDB ID: 5TAL)<sup>3</sup>. hIP<sub>3</sub>R-3 is colored as in Fig. 1, and RyR1 is colored in salmon. Ca<sup>2+</sup> and ATP binding sites are boxed. **b** Close-up views of the Ca<sup>2+</sup>. Residues coordinating Ca<sup>2+</sup> are shown as sticks and labeled. **c-d** Close-up view of the ATP binding site of hIP<sub>3</sub>R-3 aligned onto the corresponding domains of rabbit RyR-1s ((**c**) PDB ID: 5TAL and (**d**) PDB ID:7M6A<sup>4</sup>). Select residues are shown as sticks and labeled. **e-f** Alignment of the S6 and P helices viewed through the membrane plane (**e**) and cytoplasm (**f**). Two of the subunits were not shown in panel **e** for clarity.

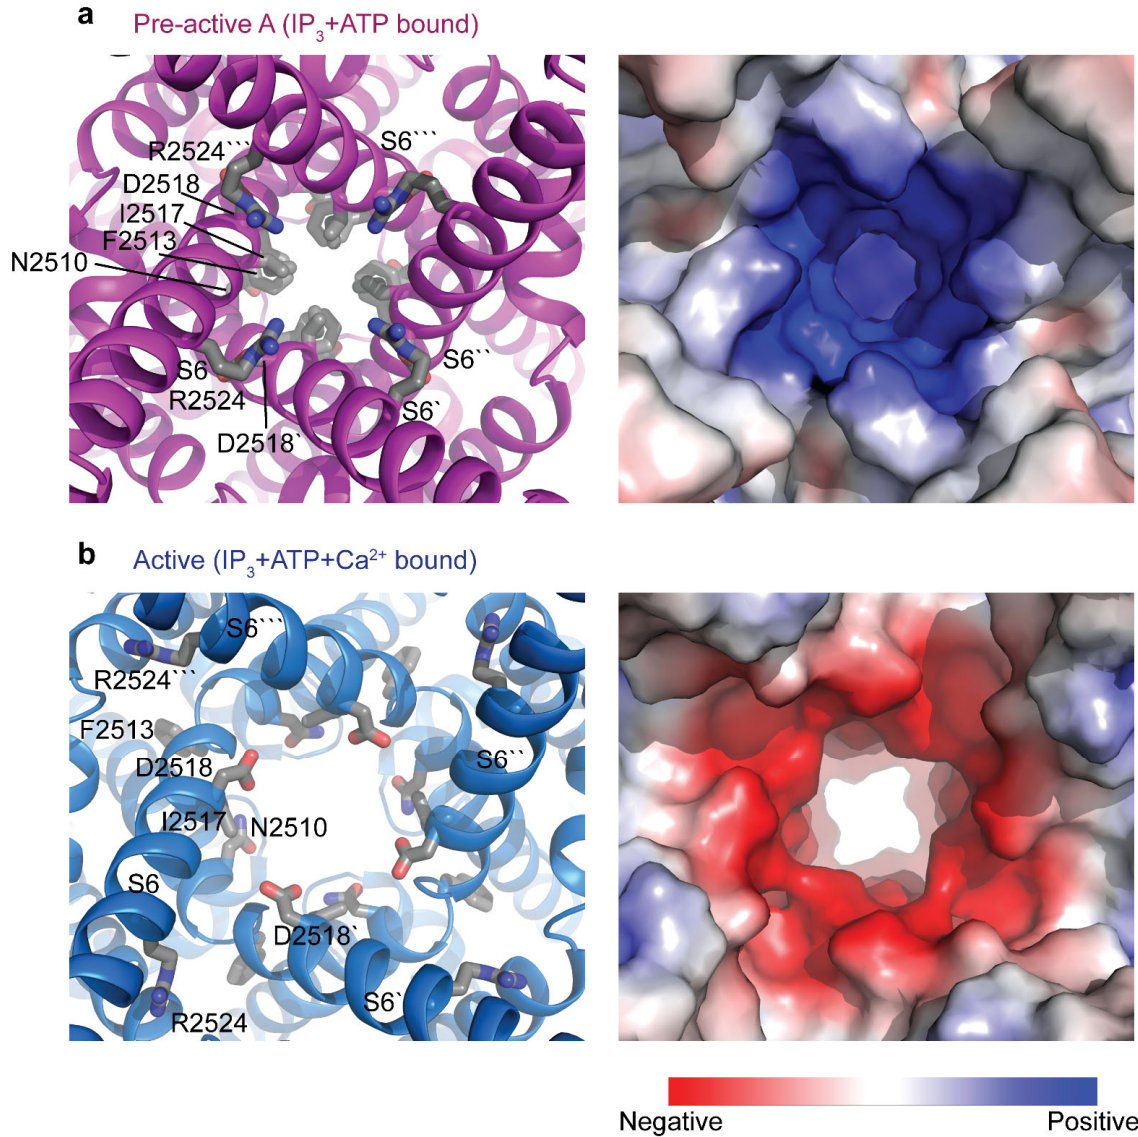

**Supplementary Fig. 11: Structural comparison of hIP<sub>3</sub>R-3 pores in closed and open conformations.** a-b Close up cytoplasmic view of the IP<sub>3</sub>R-3 pores in the closed (a) and open (b) conformations in ribbon (left) and electrostatic surface representations. Pore lining residues are shown as grey sticks. ` is used to differentiate residues in different subunits.

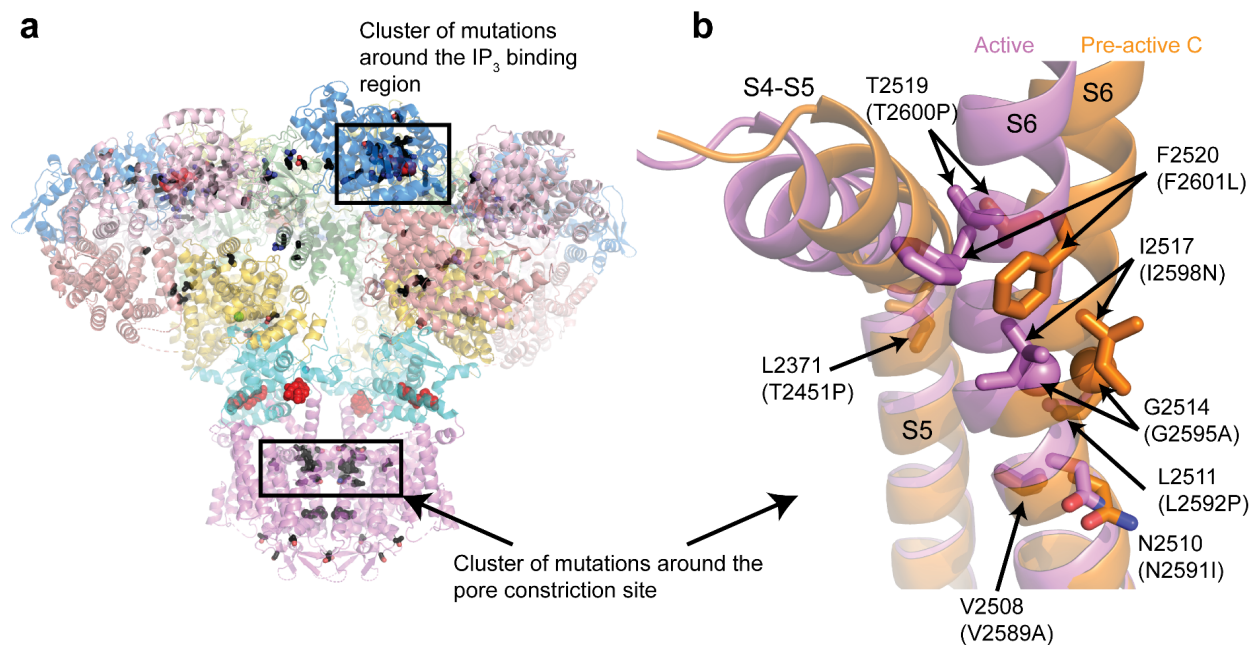

**Supplementary Fig. 12: Mutation hot spots of IP<sub>3</sub>Rs.** **a** Mutations associated with diseases or annotated as pathogenic or likely pathogenic in ClinVar database (<https://www.ncbi.nlm.nih.gov/clinvar/>) for all three subtypes of IP<sub>3</sub>Rs are mapped onto the hIP<sub>3</sub>R-3 structure in the active conformation. Each domain is colored as in Fig. 1, and the mutated residues are shown as black sticks. IP<sub>3</sub> and ATP are shown as red spheres, and Ca<sup>2+</sup> ions are shown as green spheres. Clusters of mutations around the IP<sub>3</sub> binding site and the pore constriction site are indicated in black boxes. **b** Close-up view of the mutated residues around the pore constriction site. Only one protomer of pre-active C and active state structures are shown. Structures are aligned as described in Fig. 2. Mutated residues are labeled based on IP<sub>3</sub>R-3 numbering and IP<sub>3</sub>R-1 numbering with the mutations inside parentheses. The reference sequences used for IP<sub>3</sub>R-3 are UniProtKB-Q14573 and for IP<sub>3</sub>R-1 are UniProtKB-Q14643.

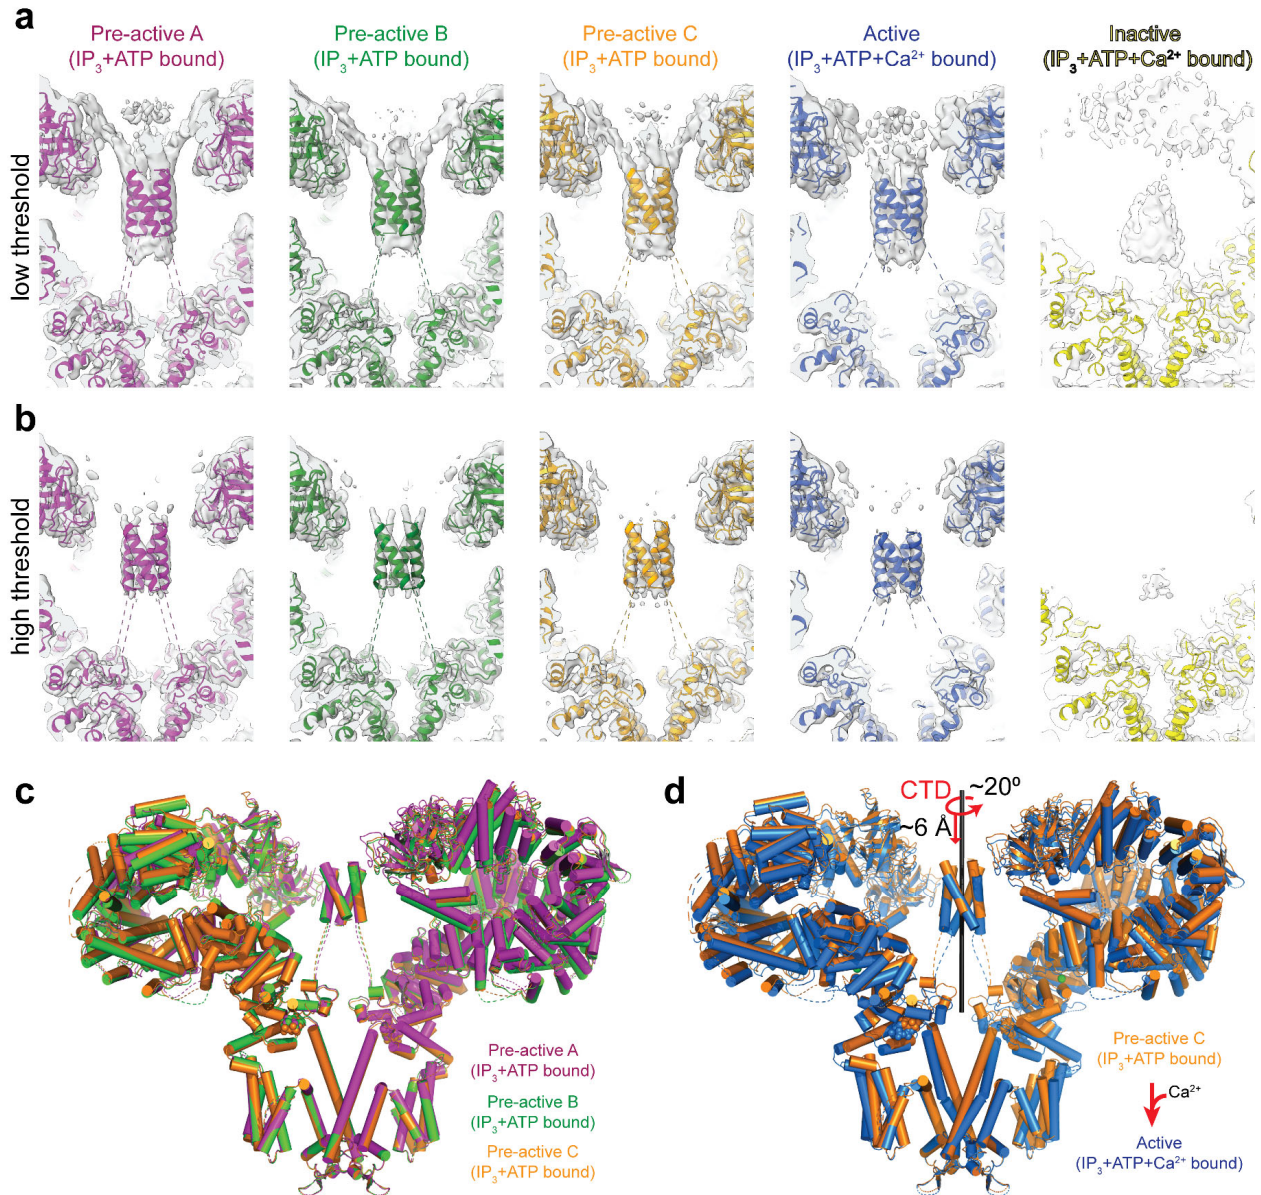

**Supplementary Fig. 13: The flexible architecture of the CTD.** **a-b** Unsharpened Cryo-EM map sections of hIP<sub>3</sub>R-3 in different gating conformations are shown using lower (**a**) and higher (**b**) threshold values to emphasize the variability of the regions connecting the coiled-coil region to the B-TF1 and JDs. Maps are the original maps from the non-uniform refinements and are shown as transparent grey surfaces. The ribbon representations of the fitted models are colored as indicated above each column. **c** There are no noticeable changes for the coiled-coil region of hIP<sub>3</sub>R-3 in the pre-active conformations. **d** The coiled coil region makes a screw-like motion towards the JD during activation. **c-d** Alignments are performed as in Figure 2. Only two opposing subunits are shown except for the coiled-coil region.

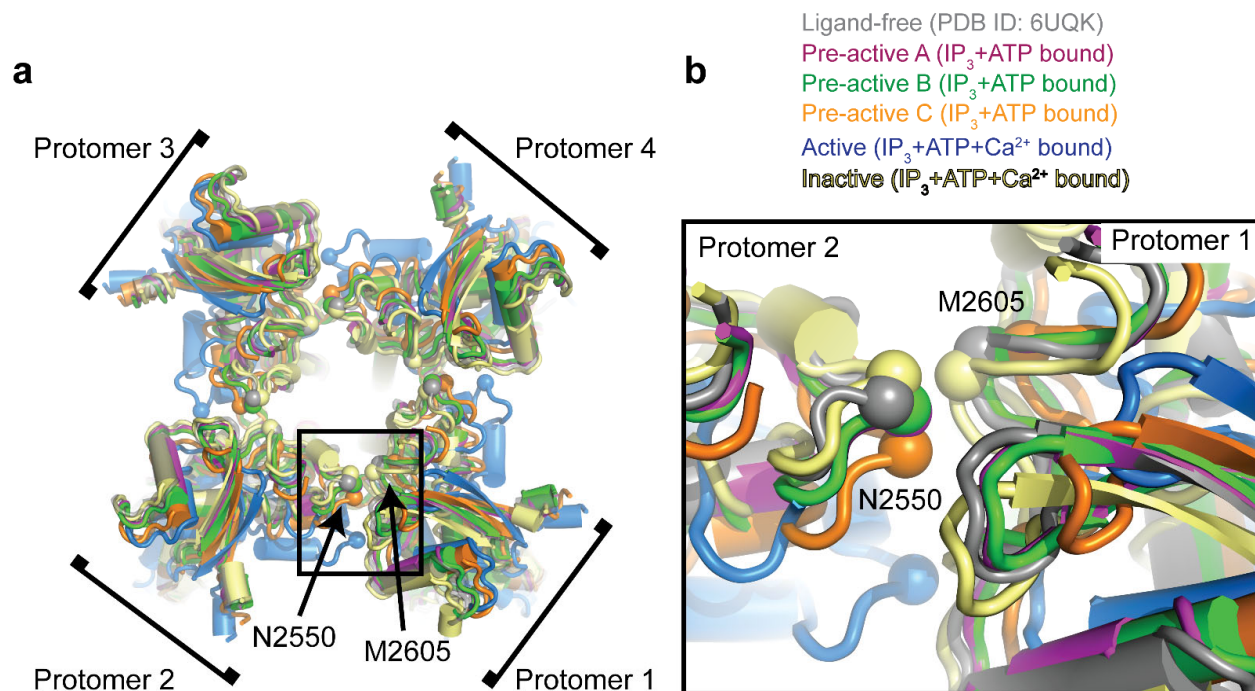

**Supplementary Fig. 14: Structural changes of the JDs.** **a** The tetrameric JDs of hIP<sub>3</sub>R-3 in multiple gating conformations viewed from cytoplasm through the 4-fold symmetry axis. Structures are superposed on the residues forming the selectivity filter and P-helix of the TMDs. **b** Zoomed view of the boxed area. Structures are colored as in Fig. 2. The C $\alpha$  atoms for the residues N2550 and M2605 are shown as spheres to emphasize the structural differences among different conformations.



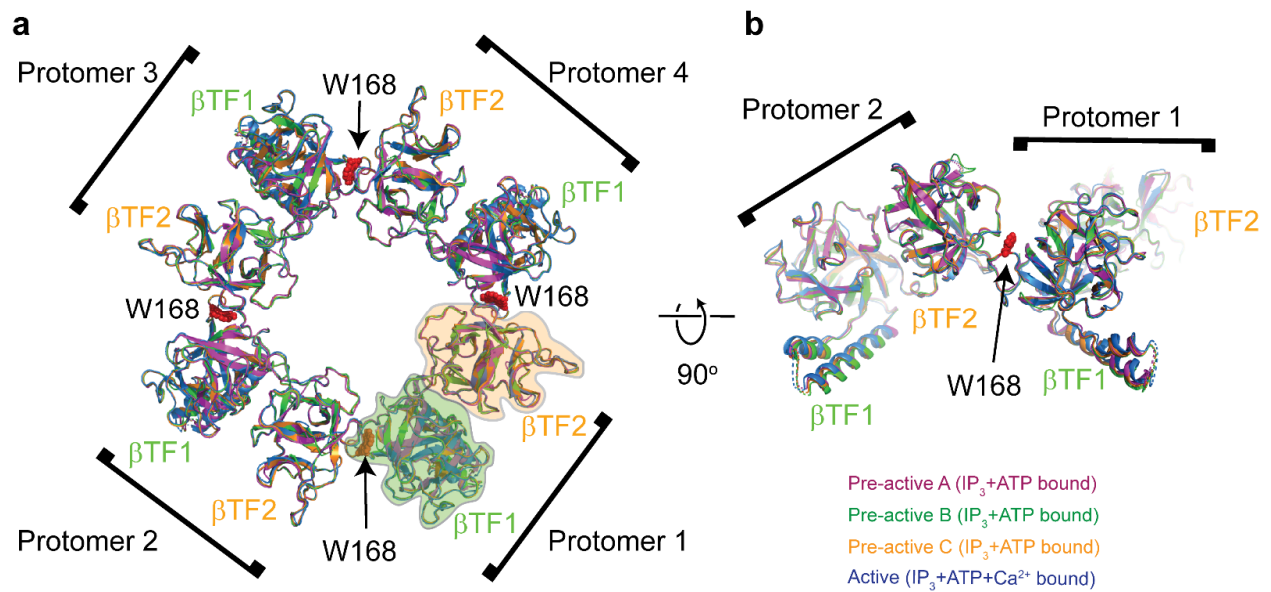

**Supplementary Fig. 15: Structure of the  $\beta$ TF ring.** **a** Aligned structures of the  $\beta$ TF rings of hIP<sub>3</sub>R-3 in multiple gating conformations viewed from cytoplasm through the 4-fold symmetry axis. **b** 90° rotated view of panel a. Structures are colored as in Fig. 2. The  $\beta$ TF1 and  $\beta$ TF2 of each protomer are labeled, and they are circled for one of the protomers to highlight their boundaries. W168 is shown as red spheres.

**Supplementary Table 1: Cryo-EM data collection, refinement, and validation statistics**

| <b>Data collection and processing</b>                      |                                 |                     |                     |               |                 |
|------------------------------------------------------------|---------------------------------|---------------------|---------------------|---------------|-----------------|
| Microscope                                                 | FEI Krios G3i microscope        |                     |                     |               |                 |
| Detector                                                   | Gatan K3 direct electron camera |                     |                     |               |                 |
| Nominal magnification                                      | 105,000 x                       |                     |                     |               |                 |
| Voltage (kV)                                               | 300                             |                     |                     |               |                 |
| Electron exposure (e/Å <sup>2</sup> )                      | ~60                             |                     |                     |               |                 |
| Defocus range (µm)                                         | -0.8 to -1.6                    |                     |                     |               |                 |
| Pixel size (Å)                                             | 0.828                           |                     |                     |               |                 |
| Number of Micrographs                                      | 42,361                          |                     |                     |               |                 |
| Particles images (no.)                                     | 846,122                         |                     |                     |               |                 |
| Conformational state                                       | <b>Pre-active A</b>             | <b>Pre-active B</b> | <b>Pre-active C</b> | <b>Active</b> | <b>Inactive</b> |
| PDB ID                                                     | 7T3P                            | 7T3Q                | 7T3R                | 7T3T          | 7T3U            |
| EMDB ID                                                    | EMD-25667                       | EMD-25668           | EMD-25669           | EMD-25670     | EMD-25671       |
| Symmetry imposed                                           | C4                              | C4                  | C4                  | C4            | C1              |
| Final particles images (no.)                               | 116,925                         | 153,765             | 75,994              | 20,039        | 198,441         |
| Map resolution (Å)<br>(FSC threshold=0.143)                | 3.2                             | 3.3                 | 3.4                 | 3.8           | 3.7             |
| <b>Refinement</b>                                          |                                 |                     |                     |               |                 |
| Model resolution (Å)<br>(original map, FSC threshold=0.5)  | 3.7                             | 3.6                 | 3.8                 | 4.1           | 8.0             |
| Model resolution (Å)<br>(composite map, FSC threshold=0.5) | 3.0                             | 3.0                 | 3.1                 | 3.6           | 3.6             |
| B-factor used for map sharpening (Å <sup>2</sup> )         | -100                            | -100                | -100                | -100          | -100            |
| <b>Model composition</b>                                   |                                 |                     |                     |               |                 |
| Non-hydrogen atoms                                         | 66,992                          | 68,124              | 68,780              | 68,516        | 44,501          |
| Protein residues                                           | 8,188                           | 8,336               | 8,444               | 8,408         | 7,269           |
| Zn <sup>2+</sup>                                           | 4                               | 4                   | 4                   | 4             | 4               |
| IP <sub>3</sub>                                            | 4                               | 4                   | 4                   | 4             | 2               |
| ATP                                                        | 4                               | 4                   | 4                   | 4             | 4               |
| Ca <sup>2+</sup>                                           | -                               | -                   | -                   | 4             | 4               |
| <b>Mean B factors (Å<sup>2</sup>)</b>                      |                                 |                     |                     |               |                 |
| Protein                                                    | 46.89                           | 63.80               | 67.80               | 113.62        | 79.55           |
| Ligands                                                    | 61.05                           | 74.57               | 83.85               | 172.47        | 89.42           |
| <b>R.m.s. deviations</b>                                   |                                 |                     |                     |               |                 |
| Bond lengths (Å)                                           | 0.004                           | 0.004               | 0.004               | 0.003         | 0.002           |
| Bond angles (°)                                            | 0.514                           | 0.519               | 0.519               | 0.510         | 0.434           |
| <b>Molprobrity score</b>                                   | 1.73                            | 1.73                | 1.77                | 1.74          | 1.63            |
| <b>Clash score</b>                                         | 8.24                            | 7.57                | 8.25                | 8.16          | 6.21            |
| <b>Poor rotamers (%)</b>                                   | 0.00                            | 0.00                | 0.00                | 0.05          | 0.00            |
| <b>Ramachandran plot</b>                                   |                                 |                     |                     |               |                 |
| Favored (%)                                                | 95.88                           | 95.48               | 95.30               | 95.68         | 95.77           |
| Allowed (%)                                                | 4.12                            | 4.52                | 4.65                | 4.32          | 4.23            |
| Disallowed (%)                                             | 0.00                            | 0.00                | 0.05                | 0.00          | 0.00            |

## Supplementary References

- 1 Paknejad, N. & Hite, R. K. Structural basis for the regulation of inositol trisphosphate receptors by Ca(2+) and IP3. *Nat Struct Mol Biol* **25**, 660-668 (2018).
- 2 Azumaya, C. M., Linton, E. A., Risener, C. J., Nakagawa, T. & Karakas, E. Cryo-EM structure of human type-3 inositol triphosphate receptor reveals the presence of a self-binding peptide that acts as an antagonist. *J Biol Chem* **295**, 1743-1753 (2020).
- 3 des Georges, A. *et al.* Structural Basis for Gating and Activation of RyR1. *Cell* **167**, 145-157 e117 (2016).
- 4 Melville, Z., Kim, K., Clarke, O. B. & Marks, A. R. High-resolution structure of the membrane-embedded skeletal muscle ryanodine receptor. *Structure* (2021).
